# Supplementary material for: Integrated virus-host methylome analysis in head and neck squamous cell carcinoma
Source: PubMed Central journal article supplement — Epigenetics. 2013 Jul 18;8(9):953–61. doi: 10.4161/epi.25614 (PMC3883772; doi:10.4161/epi.25614), 2013-07-18
Supplement: epi-8-953-s01.pdf [file epi-8-953-s01.pdf]

## **Supplemental Material to:**

**Gareth A Wilson, Matthias Lechner, Anna Köferle, Helena Caren, Lee M Butcher, Andrew Feber, Tim Fenton, Amrita Jay, Chris Boshoff, and Stephan Beck**

**Integrated virus-host methylome analysis in head and neck squamous cell carcinoma**

**Epigenetics 2013; 8(9)**

**<http://dx.doi.org/10.4161/epi.25614>**

**[http://www.landesbioscience.com/journals/epigenetics/  
article/25614](http://www.landesbioscience.com/journals/epigenetics/article/25614)**

| Sample ID | HPV status | Viral titer (copies/cell by E6 qPCR) | Initial reads (total, pre-alignment) | Uniquely mapped fragments (q $\geq$ 10) |
|-----------|------------|--------------------------------------|--------------------------------------|-----------------------------------------|
| HN_29     | neg        | 0                                    | 52,655,678                           | 16,658,305                              |
| HN_32     | neg        | 0                                    | 58,152,760                           | 18,946,120                              |
| HN_39     | pos        | 96.94                                | 40,889,864                           | 11,680,329                              |
| HN_96     | neg        | 0                                    | 41,538,032                           | 12,317,714                              |
| HN_105    | pos        | 110.44                               | 36,259,072                           | 11,135,937                              |
| HN_125    | pos        | 0.66                                 | 47,522,856                           | 14,868,967                              |

**Supplementary Table 1:** Summary of read counts and viral counts for each of the MeDIP-seq samples

| HPV type                               | Reference Sequence Accession Code (NCBI) |      |      |      |      |       |       |
|----------------------------------------|------------------------------------------|------|------|------|------|-------|-------|
|                                        |                                          | HN29 | HN32 | HN39 | HN96 | HN105 | HN125 |
| Human_papillomavirus_type_18_uid15506  | NC_001357                                | 0    | 0    | 0    | 0    | 0     | 0     |
| Human_papillomavirus_type_1_uid15491   | NC_001356                                | 0    | 0    | 0    | 0    | 0     | 0     |
| Human_papillomavirus_type_2_uid15512   | NC_001352                                | 0    | 0    | 0    | 0    | 0     | 0     |
| Human_papillomavirus_type_54_uid15466  | NC_001676                                | 0    | 0    | 0    | 0    | 0     | 0     |
| Human_papillomavirus_type_101_uid17121 | NC_008189                                | 0    | 0    | 0    | 0    | 0     | 0     |
| Human_papillomavirus_type_103_uid17119 | NC_008188                                | 0    | 0    | 0    | 0    | 0     | 0     |
| Human_papillomavirus_type_108_uid34847 | NC_012213                                | 0    | 0    | 0    | 0    | 0     | 0     |
| Human_papillomavirus_type_10_uid15504  | NC_001576                                | 0    | 0    | 0    | 0    | 0     | 0     |
| Human_papillomavirus_type_16_uid15505  | NC_001526                                | 0    | 0    | 1449 | 0    | 787   | 17    |
| Human_papillomavirus_type_26_uid15507  | NC_001583                                | 0    | 0    | 0    | 0    | 0     | 0     |
| Human_papillomavirus_type_32_uid15508  | NC_001586                                | 0    | 0    | 0    | 0    | 0     | 0     |
| Human_papillomavirus_type_34_uid15509  | NC_001587                                | 0    | 0    | 0    | 0    | 0     | 0     |
| Human_papillomavirus_type_41_uid15485  | NC_001354                                | 0    | 0    | 0    | 0    | 0     | 0     |
| Human_papillomavirus_type_48_uid14027  | NC_001690                                | 0    | 0    | 0    | 0    | 0     | 0     |
| Human_papillomavirus_type_49_uid15455  | NC_001591                                | 0    | 0    | 0    | 0    | 0     | 0     |
| Human_papillomavirus_type_4_uid15492   | NC_001457                                | 0    | 0    | 0    | 0    | 0     | 0     |
| Human_papillomavirus_type_50_uid14327  | NC_001691                                | 0    | 0    | 0    | 0    | 0     | 0     |
| Human_papillomavirus_type_53_uid15510  | NC_001593                                | 0    | 0    | 0    | 0    | 0     | 0     |
| Human_papillomavirus_type_5_uid15511   | NC_001531                                | 0    | 0    | 0    | 0    | 0     | 0     |
| Human_papillomavirus_type_60_uid14028  | NC_001693                                | 0    | 0    | 0    | 0    | 0     | 0     |

|                                       |           |   |   |   |   |   |   |
|---------------------------------------|-----------|---|---|---|---|---|---|
| Human_papillomavirus_type_63_uid15486 | NC_001458 | 0 | 0 | 0 | 0 | 0 | 0 |
| Human_papillomavirus_type_6b_uid15454 | NC_001355 | 0 | 0 | 0 | 0 | 0 | 0 |
| Human_papillomavirus_type_7_uid15450  | NC_001595 | 0 | 0 | 0 | 0 | 0 | 0 |
| Human_papillomavirus_type_88_uid28737 | NC_010329 | 0 | 0 | 0 | 0 | 0 | 0 |
| Human_papillomavirus_type_90_uid15424 | NC_004104 | 0 | 0 | 0 | 0 | 0 | 0 |
| Human_papillomavirus_type_92_uid14406 | NC_004500 | 0 | 0 | 0 | 0 | 0 | 0 |
| Human_papillomavirus_type_96_uid15488 | NC_005134 | 0 | 0 | 0 | 0 | 0 | 0 |
| Human_papillomavirus_type_9_uid15456  | NC_001596 | 0 | 0 | 0 | 0 | 0 | 0 |

**Supplementary Table 2:** 29 human papilloma viruses, including Reference Sequence Accession Codes, obtained from NCBI Genomes (<http://www.ncbi.nlm.nih.gov/genomes>) (28/03/2011). Number of reads aligning to each HPV strain for each sample is also shown.

| Regions hypermethylated in HPV+ rel. to HPV- HNSCC falling into CpG Islands |                                               |                      | Regions hypomethylated in HPV+ rel. to HPV- HNSCC falling into CpG Islands |                                               |                      |
|-----------------------------------------------------------------------------|-----------------------------------------------|----------------------|----------------------------------------------------------------------------|-----------------------------------------------|----------------------|
| Encode Factor                                                               | Fisher's Exact Test (1-tailed, FDR corrected) | TRAP (FDR corrected) | Encode Factor                                                              | Fisher's Exact Test (1-tailed, FDR corrected) | TRAP (FDR corrected) |
| c-Fos                                                                       | 1.65E-03                                      |                      | SETDB1                                                                     | 1.87E-02                                      |                      |
| MEF2A                                                                       | 1.82E-03                                      |                      | IRF4_(M-17)                                                                | 2.02E-02                                      |                      |
| E2F4                                                                        | 1.85E-03                                      |                      | MafF_(M8194)                                                               | 2.41E-02                                      |                      |
| IRF3                                                                        | 1.85E-03                                      |                      | SP1                                                                        | 2.75E-02                                      | 5.70E-05             |
| BCLAF1_(M33-P5B11)                                                          | 1.85E-03                                      |                      | BRCA1_(C-1863)                                                             | 3.63E-02                                      |                      |
| PAX5-N19                                                                    | 1.85E-03                                      |                      | MafK_(ab50322)                                                             | 3.63E-02                                      |                      |
| STAT1                                                                       | 2.02E-03                                      |                      | PAX5-N19                                                                   | 3.86E-02                                      |                      |
| E2F6                                                                        | 2.38E-03                                      |                      | SIX5                                                                       | 4.23E-02                                      |                      |
| HSF1                                                                        | 2.45E-03                                      |                      | SIRT6                                                                      | 4.69E-02                                      |                      |
| Pol3                                                                        | 3.35E-03                                      |                      | RPC155                                                                     | 4.94E-02                                      |                      |
| FOSL2                                                                       | 5.85E-03                                      |                      | GTF2F1_(RAP-74)                                                            | 5.93E-02                                      |                      |
| TFIIIC-110                                                                  | 5.86E-03                                      |                      | eGFP-JunB                                                                  | 6.25E-02                                      |                      |
| KAP1                                                                        | 6.78E-03                                      |                      | c-Jun                                                                      | 6.42E-02                                      |                      |
| IRF4_(M-17)                                                                 | 9.98E-03                                      |                      | FOSL1_(SC-183)                                                             | 6.42E-02                                      |                      |
| HNF4A                                                                       | 1.00E-02                                      |                      | MafK_(SC-477)                                                              | 8.80E-02                                      |                      |
| EBF1_(C-8)                                                                  | 1.33E-02                                      | 1.50E-04             | CEBPB                                                                      | 9.10E-02                                      |                      |
| Pol2(b)                                                                     | 1.36E-02                                      |                      | FOXA1_(C-20)                                                               | 9.10E-02                                      |                      |
| SRF                                                                         | 1.37E-02                                      |                      | FOSL2                                                                      | 1.00E-01                                      |                      |
| GATA-2                                                                      | 1.56E-02                                      |                      | RFX5_(N-494)                                                               | 1.06E-01                                      |                      |
| MafK_(SC-477)                                                               | 1.56E-02                                      |                      | eGFP-JunD                                                                  | 1.08E-01                                      |                      |
| GR                                                                          | 1.96E-02                                      |                      | HSF1                                                                       | 1.13E-01                                      |                      |
| BATF                                                                        | 1.98E-02                                      |                      | HNF4A_(H-171)                                                              | 1.26E-01                                      |                      |
| BRF1                                                                        | 1.98E-02                                      |                      | NF-E2_(H-230)                                                              | 1.26E-01                                      |                      |
| GATA2_(CG2-96)                                                              | 1.98E-02                                      |                      | p300_(N-15)                                                                | 1.38E-01                                      |                      |
| SUZ12                                                                       | 2.62E-02                                      |                      | eGFP-GATA2                                                                 | 1.57E-01                                      |                      |
| TAL1_(SC-12984)                                                             | 2.82E-02                                      |                      | IRF3                                                                       | 1.57E-01                                      |                      |
| BRCA1_(C-1863)                                                              | 2.83E-02                                      |                      | STAT1                                                                      | 1.57E-01                                      |                      |
| ERRA                                                                        | 3.11E-02                                      |                      | Pbx3                                                                       | 1.65E-01                                      |                      |
| NF-E2                                                                       | 3.11E-02                                      |                      | BHLHE40                                                                    | 1.69E-01                                      |                      |
| SIRT6                                                                       | 3.11E-02                                      |                      | GR                                                                         | 1.76E-01                                      |                      |
| TCF4                                                                        | 4.15E-02                                      |                      | MEF2A                                                                      | 2.10E-01                                      |                      |
| BRF2                                                                        | 5.14E-02                                      |                      | JunD                                                                       | 2.15E-01                                      |                      |
| GRp20                                                                       | 6.07E-02                                      |                      | GATA-2                                                                     | 2.57E-01                                      |                      |

|                   |          |          |                    |          |          |
|-------------------|----------|----------|--------------------|----------|----------|
| c-Myc             | 3.86E-06 | 5.90E-10 | SMC3_(ab9263)      | 5.36E-06 |          |
| EBF               | 4.31E-06 |          | POU2F2             | 6.41E-06 |          |
| ZBTB7A_(SC-34508) | 4.43E-06 |          | Oct 2, 2013        | 7.12E-06 |          |
| p300              | 8.47E-06 |          | USF-1              | 8.48E-06 |          |
| TAF7_(SQ-8)       | 9.23E-06 |          | HMG3               | 1.05E-05 |          |
| RFX5_(N-494)      | 1.03E-05 |          | NRSF               | 1.19E-05 |          |
| HDAC2_(SC-6296)   | 1.50E-05 |          | ETS1               | 1.25E-05 |          |
| IRF1              | 1.64E-05 |          | GABP               | 3.44E-05 | 1.20E-05 |
| NF-YA             | 1.74E-05 |          | USF2               | 4.88E-05 |          |
| NRSF              | 2.31E-05 |          | CtBP2              | 6.62E-05 |          |
| RXRA              | 3.37E-05 |          | EBF                | 7.23E-05 |          |
| E2F1              | 4.33E-05 |          | NFKB               | 1.13E-04 | 4.16E-06 |
| BDP1              | 4.42E-05 |          | ELK4               | 1.58E-04 |          |
| HNF4G_(SC-6558)   | 6.09E-05 |          | Ini1               | 1.71E-04 |          |
| Max               | 6.22E-05 |          | STAT2              | 2.92E-04 |          |
| ATF3              | 6.22E-05 |          | USF1_(SC-8983)     | 7.80E-04 |          |
| ETS1              | 7.29E-05 |          | Pol2(b)            | 1.21E-03 |          |
| GABP              | 8.44E-05 | 8.99E-03 | Pol2(phosphoS2)    | 1.49E-03 |          |
| eGFP-JunD         | 1.00E-04 |          | Mxi1_(bHLH)        | 1.50E-03 |          |
| CHD2_(N-1250)     | 1.19E-04 |          | CHD2_(N-1250)      | 2.47E-03 |          |
| JunD              | 1.19E-04 |          | TAL1_(SC-12984)    | 2.64E-03 |          |
| PU.1              | 1.42E-04 |          | E2F4               | 3.20E-03 |          |
| USF2              | 1.77E-04 |          | c-Fos              | 5.79E-03 |          |
| ERalpha_a         | 2.20E-04 |          | SRF                | 7.55E-03 |          |
| p300_(N-15)       | 2.60E-04 |          | NELFe              | 8.34E-03 |          |
| POU2F2            | 3.94E-04 |          | ATF3               | 1.02E-02 |          |
| Oct2              | 4.40E-04 |          | eGFP-FOS           | 1.26E-02 |          |
| THAP1_(SC-98174)  | 5.38E-04 |          | IRF1               | 1.54E-02 |          |
| SP2_(SC-643)      | 6.12E-04 |          | SP2_(SC-643)       | 1.55E-02 |          |
| HNF4A_(H-171)     | 9.07E-04 |          | GTF2B              | 1.55E-02 |          |
| GATA3_(SC-268)    | 9.07E-04 |          | BCLAF1_(M33-P5B11) | 1.76E-02 |          |
| RPC155            | 9.07E-04 |          | PGC1A              | 1.76E-02 |          |
| ZEB1_(SC-25388)   | 9.44E-04 |          | TCF4               | 1.76E-02 |          |
| SIX5              | 1.09E-03 |          | ZBTB33             | 1.77E-02 |          |

| Regions hypermethylated in HPV+ rel. to HPV- HNSCC falling into CpG Islands |                                               |                      | Regions hypomethylated in HPV+ rel. to HPV- HNSCC falling into CpG Islands |                                               |                      |
|-----------------------------------------------------------------------------|-----------------------------------------------|----------------------|----------------------------------------------------------------------------|-----------------------------------------------|----------------------|
| Encode Factor                                                               | Fisher's Exact Test (1-tailed, FDR corrected) | TRAP (FDR corrected) | Encode Factor                                                              | Fisher's Exact Test (1-tailed, FDR corrected) | TRAP (FDR corrected) |
| SREBP1                                                                      | 6.07E-02                                      |                      | STAT3                                                                      | 2.61E-01                                      |                      |
| STAT3                                                                       | 6.07E-02                                      |                      | Brg1                                                                       | 2.64E-01                                      |                      |
| CEBPB                                                                       | 8.29E-02                                      |                      | p300                                                                       | 2.76E-01                                      |                      |
| NF-E2_(H-230)                                                               | 8.41E-02                                      |                      | p300_(F-4)                                                                 | 2.76E-01                                      |                      |
| Pol2(phosphoS2)                                                             | 9.83E-02                                      |                      | NANOG_(SC-33759)                                                           | 2.92E-01                                      |                      |
| MafK_(ab50322)                                                              | 1.05E-01                                      |                      | KAP1                                                                       | 3.11E-01                                      |                      |
| BAF170                                                                      | 1.43E-01                                      |                      | NF-YB                                                                      | 3.15E-01                                      |                      |
| BCL11A                                                                      | 1.43E-01                                      |                      | BCL3                                                                       | 3.18E-01                                      |                      |
| CtBP2                                                                       | 1.43E-01                                      |                      | E2F1                                                                       | 3.26E-01                                      |                      |
| TCF12                                                                       | 1.55E-01                                      |                      | GRp20                                                                      | 3.26E-01                                      |                      |
| AP-2gamma                                                                   | 1.86E-01                                      |                      | GATA2_(CG2-96)                                                             | 3.33E-01                                      |                      |
| c-Jun                                                                       | 2.02E-01                                      |                      | WHIP                                                                       | 3.33E-01                                      |                      |
| SETDB1                                                                      | 2.50E-01                                      |                      | ZZZ3                                                                       | 3.33E-01                                      |                      |
| FOSL1_(SC-183)                                                              | 2.77E-01                                      |                      | RXRA                                                                       | 3.38E-01                                      |                      |
| TR4                                                                         | 2.78E-01                                      |                      | NF-YA                                                                      | 3.53E-01                                      |                      |
| eGFP-JunB                                                                   | 3.13E-01                                      |                      | HDAC2_(SC-6296)                                                            | 3.81E-01                                      |                      |
| FOXA1_(SC-101058)                                                           | 3.33E-01                                      |                      | ERalpha_a                                                                  | 4.34E-01                                      |                      |
| Mxi1_(bHLH)                                                                 | 3.33E-01                                      |                      | TR4                                                                        | 4.34E-01                                      |                      |
| POU5F1_(SC-9081)                                                            | 3.36E-01                                      |                      | GATA-1                                                                     | 4.60E-01                                      |                      |
| ELK4                                                                        | 3.48E-01                                      |                      | AP-2gamma                                                                  | 4.80E-01                                      |                      |
| FOXA2_(SC-6554)                                                             | 3.55E-01                                      |                      | BCL11A                                                                     | 4.84E-01                                      |                      |
| GTF2B                                                                       | 3.68E-01                                      |                      | MEF2C_(SC-13268)                                                           | 4.84E-01                                      |                      |
| ZBTB33                                                                      | 3.72E-01                                      |                      | BATF                                                                       | 5.23E-01                                      |                      |
| MafF_(M8194)                                                                | 4.23E-01                                      |                      | TFIIIC-110                                                                 | 5.33E-01                                      |                      |
| AP-2alpha                                                                   | 4.43E-01                                      |                      | BAF155                                                                     | 6.11E-01                                      |                      |
| BCL3                                                                        | 4.43E-01                                      |                      | HNF4A                                                                      | 6.18E-01                                      |                      |
| BAF155                                                                      | 5.33E-01                                      |                      | GATA3_(SC-268)                                                             | 6.66E-01                                      |                      |
| BHLHE40                                                                     | 5.75E-01                                      |                      | THAP1_(SC-98174)                                                           | 6.71E-01                                      |                      |
| GATA-1                                                                      | 5.77E-01                                      |                      | FOXA1_(SC-101058)                                                          | 8.97E-01                                      |                      |
| Ini1                                                                        | 7.40E-01                                      |                      | FOXA2_(SC-6554)                                                            | 9.78E-01                                      |                      |
| FOXA1_(C-20)                                                                | 8.91E-01                                      |                      | AP-2alpha                                                                  | 1                                             |                      |
| Brg1                                                                        | 1                                             |                      | BAF170                                                                     | 1                                             |                      |
| eGFP-FOS                                                                    | 1                                             |                      | BDP1                                                                       | 1                                             |                      |

| Regions hypermethylated in HPV+ rel. to HPV- HNSCC falling into CpG Islands |                                               |                      | Regions hypomethylated in HPV+ rel. to HPV- HNSCC falling into CpG Islands |                                               |                      |
|-----------------------------------------------------------------------------|-----------------------------------------------|----------------------|----------------------------------------------------------------------------|-----------------------------------------------|----------------------|
| Encode Factor                                                               | Fisher's Exact Test (1-tailed, FDR corrected) | TRAP (FDR corrected) | Encode Factor                                                              | Fisher's Exact Test (1-tailed, FDR corrected) | TRAP (FDR corrected) |
| eGFP-GATA2                                                                  | 1                                             |                      | BRF1                                                                       | 1                                             |                      |
| eGFP-HDAC8                                                                  | 1                                             |                      | BRF2                                                                       | 1                                             |                      |
| eGFP-NR4A1                                                                  | 1                                             |                      | eGFP-HDAC8                                                                 | 1                                             |                      |
| GCN5                                                                        | 1                                             |                      | eGFP-NR4A1                                                                 | 1                                             |                      |
| MEF2C_(SC-13268)                                                            | 1                                             |                      | ERRA                                                                       | 1                                             |                      |
| NELFe                                                                       | 1                                             |                      | GCN5                                                                       | 1                                             |                      |
| p300_(F-4)                                                                  | 1                                             |                      | HNF4G_(SC-6558)                                                            | 1                                             |                      |
| PGC1A                                                                       | 1                                             |                      | NF-E2                                                                      | 1                                             |                      |
| PRDM1_(Val90)                                                               | 1                                             |                      | Pol3                                                                       | 1                                             |                      |
| SPT20                                                                       | 1                                             |                      | POU5F1_(SC-9081)                                                           | 1                                             |                      |
| SREBP2                                                                      | 1                                             |                      | PRDM1_(Val90)                                                              | 1                                             |                      |
| STAT2                                                                       | 1                                             |                      | SPT20                                                                      | 1                                             |                      |
| WHIP                                                                        | 1                                             |                      | SREBP1                                                                     | 1                                             |                      |
| XRCC4                                                                       | 1                                             |                      | SREBP2                                                                     | 1                                             |                      |
| ZNF274                                                                      | 1                                             |                      | XRCC4                                                                      | 1                                             |                      |
| ZZZ3                                                                        | 1                                             |                      | ZNF274                                                                     | 1                                             |                      |

**Supplementary Table 3:** Putative associations between DMRs and transcription factor binding sites. All transcription factors considered in the analysis are shown here.



| <b>Genes with E2F1 binding sites targeted by hypermethylated DMRs (HPV+ rel. to HPV- HNSCC)</b> |                  | <b>Genes with E2F1 binding sites targeted by hypomethylated DMRs (HPV+ rel. to HPV- HNSCC)</b> |                  |
|-------------------------------------------------------------------------------------------------|------------------|------------------------------------------------------------------------------------------------|------------------|
| <b>Ensembl Gene ID</b>                                                                          | <b>Gene Name</b> | <b>PID</b>                                                                                     | <b>Gene Name</b> |
| ENSG00000010270                                                                                 | STARD3NL         | ENSG00000006025                                                                                | OSBPL7           |
| ENSG000000021645                                                                                | NRXN3            | ENSG000000058335                                                                               | RASGRF1          |
| ENSG000000072135                                                                                | PTPN18           | ENSG000000087510                                                                               | TFAP2C           |
| ENSG000000104714                                                                                | ERICH1           | ENSG000000111490                                                                               | TBC1D30          |
| ENSG000000106006                                                                                | HOXA6            | ENSG000000115935                                                                               | WIPF1            |
| ENSG000000107562                                                                                | CXCL12           | ENSG000000118257                                                                               | NRP2             |
| ENSG000000108175                                                                                | ZMIZ1            | ENSG000000119919                                                                               | NKX2-3           |
| ENSG000000111052                                                                                | LIN7A            | ENSG000000123388                                                                               | HOXC11           |
| ENSG000000119139                                                                                | TJP2             | ENSG000000129255                                                                               | MPDU1            |
| ENSG000000136866                                                                                | ZFP37            | ENSG000000132182                                                                               | NUP210           |
| ENSG000000138293                                                                                | NCOA4            | ENSG000000136630                                                                               | HLX              |
| ENSG000000140941                                                                                | MAP1LC3B         | ENSG000000139508                                                                               | SLC46A3          |
| ENSG000000141526                                                                                | SLC16A3          | ENSG000000143727                                                                               | ACP1             |
| ENSG000000144681                                                                                | STAC             | ENSG000000152128                                                                               | TMEM163          |
| ENSG000000150201                                                                                | FXYP4            | ENSG000000152804                                                                               | HHEX             |
| ENSG000000151025                                                                                | GPR158           | ENSG000000154358                                                                               | OBSCN            |
| ENSG000000164093                                                                                | PITX2            | ENSG000000162086                                                                               | ZNF75A           |
| ENSG000000164904                                                                                | ALDH7A1          | ENSG000000162545                                                                               | CAMK2N1          |
| ENSG000000169629                                                                                | RGPD8            | ENSG000000162639                                                                               | HENMT1           |
| ENSG000000169862                                                                                | CTNND2           | ENSG000000162728                                                                               | KCNJ9            |
| ENSG000000170190                                                                                | SLC16A5          | ENSG000000163701                                                                               | IL17RE           |
| ENSG000000172264                                                                                | MACROD2          | ENSG000000166669                                                                               | ATF7IP2          |
| ENSG000000173404                                                                                | INSM1            | ENSG000000167363                                                                               | FN3K             |
| ENSG000000174469                                                                                | CNTNAP2          | ENSG000000171119                                                                               | NRTN             |
| ENSG000000177519                                                                                | RPRM             | ENSG000000173530                                                                               | TNFRSF10D        |
| ENSG000000177853                                                                                | ZNF518A          | ENSG000000174197                                                                               | MGA              |
| ENSG000000182963                                                                                | GJC1             | ENSG000000183963                                                                               | SMTN             |
| ENSG000000183783                                                                                | KCTD8            | ENSG000000184860                                                                               | SDR42E1          |
| ENSG000000186479                                                                                | RGS7BP           | ENSG000000185332                                                                               | TMEM105          |
| ENSG000000188002                                                                                |                  | ENSG000000185442                                                                               | FAM174B          |
| ENSG000000198879                                                                                | SFMBT2           | ENSG000000199287                                                                               |                  |
| ENSG000000204186                                                                                | ZDBF2            | ENSG000000203995                                                                               | ZYG11A           |
| ENSG000000223491                                                                                |                  | ENSG000000204950                                                                               | LRRC10B          |
| ENSG000000235978                                                                                |                  | ENSG000000213903                                                                               | LTB4R            |
| ENSG000000237575                                                                                | PYY2             | ENSG000000213994                                                                               |                  |
| ENSG000000240280                                                                                | TCAM1P           | ENSG000000225611                                                                               |                  |
| ENSG000000248597                                                                                |                  | ENSG000000228340                                                                               |                  |
| ENSG000000249328                                                                                |                  | ENSG000000228672                                                                               | C5orf65          |

| <b>Genes with E2F1 binding sites targeted by hypermethylated DMRs (HPV+ rel. to HPV- HNSCC)</b> |                  | <b>Genes with E2F1 binding sites targeted by hypomethylated DMRs (HPV+ rel. to HPV- HNSCC)</b> |                  |
|-------------------------------------------------------------------------------------------------|------------------|------------------------------------------------------------------------------------------------|------------------|
| <b>Ensembl Gene ID</b>                                                                          | <b>Gene Name</b> | <b>PID</b>                                                                                     | <b>Gene Name</b> |
| ENSG00000253982                                                                                 |                  | ENSG00000230489                                                                                | VAV3-AS1         |
|                                                                                                 |                  | ENSG00000231651                                                                                | DLG3-AS1         |
|                                                                                                 |                  | ENSG00000233384                                                                                |                  |
|                                                                                                 |                  | ENSG00000254732                                                                                |                  |
|                                                                                                 |                  | ENSG00000255542                                                                                |                  |
|                                                                                                 |                  | ENSG00000261251                                                                                |                  |
|                                                                                                 |                  | ENSG00000265683                                                                                |                  |

**Supplementary Table 4:** Genes with E2F1 binding sites targeted by DMRs.

| Genes with E2F6 binding sites targeted by hypermethylated DMRs (HPV+ rel. to HPV- HNSCC) |           | Genes with E2F6 binding sites targeted by hypomethylated DMRs (HPV+ rel. to HPV- HNSCC) |           |
|------------------------------------------------------------------------------------------|-----------|-----------------------------------------------------------------------------------------|-----------|
| Ensembl Gene ID                                                                          | Gene Name | PID                                                                                     | Gene Name |
|                                                                                          |           | ENSG00000182013                                                                         | PNMAL     |
|                                                                                          |           | ENSG00000183248                                                                         |           |
|                                                                                          |           | ENSG00000183963                                                                         | SMTN      |
|                                                                                          |           | ENSG00000185332                                                                         | TMEM105   |
|                                                                                          |           | ENSG00000185338                                                                         | SOCS1     |
|                                                                                          |           | ENSG00000185442                                                                         | FAM174B   |
|                                                                                          |           | ENSG00000185507                                                                         | IRF7      |
|                                                                                          |           | ENSG00000196660                                                                         | SLC30A10  |
|                                                                                          |           | ENSG00000199287                                                                         |           |
|                                                                                          |           | ENSG00000203808                                                                         | BVES-AS1  |
|                                                                                          |           | ENSG00000203995                                                                         | ZYG11A    |
|                                                                                          |           | ENSG00000204389                                                                         | HSPA1A    |
|                                                                                          |           | ENSG00000204950                                                                         | LRRC10B   |
|                                                                                          |           | ENSG00000213903                                                                         | LTB4R     |
|                                                                                          |           | ENSG00000225446                                                                         |           |
|                                                                                          |           | ENSG00000225611                                                                         |           |
|                                                                                          |           | ENSG00000241159                                                                         |           |
|                                                                                          |           | ENSG00000241238                                                                         |           |
|                                                                                          |           | ENSG00000254732                                                                         |           |
|                                                                                          |           | ENSG00000256806                                                                         |           |
|                                                                                          |           | ENSG00000257702                                                                         |           |
|                                                                                          |           | ENSG00000259285                                                                         |           |
|                                                                                          |           | ENSG00000259753                                                                         |           |
|                                                                                          |           | ENSG00000260669                                                                         |           |
|                                                                                          |           | ENSG00000261251                                                                         |           |

**Supplementary Table 5:** Genes with E2F6 binding sites targeted by DMRs.

|                                     | HPV+ (n=3)                                                | HPV- (n=3)                                                |
|-------------------------------------|-----------------------------------------------------------|-----------------------------------------------------------|
| Age                                 | 58.3 years (53-62)                                        | 73.6 years (66-80)                                        |
| Gender                              | M: 2<br>F: 1                                              | M: 3<br>F: 0                                              |
| Tumour site                         | Oropharynx: 3                                             | Oropharynx: 3                                             |
| Tumour grade                        | Well diff: 0<br>Mod diff: 0<br>Poorly diff: 3             | Well diff: 0<br>Mod diff: 1<br>Poorly diff: 2             |
| Tumour stage (T)                    | T1: 0<br>T2: 3<br>T3: 0<br>T4: 0<br>N/a: 0                | T1: 0<br>T2: 0<br>T3: 0<br>T4: 2<br>N/a: 1                |
| Cervical lymph node involvement (N) | Yes: 3<br>No: 0<br>N/a: 0                                 | Yes: 0<br>No: 2<br>N/a: 1                                 |
| Smoking                             | Ever: 3<br>Never: 0<br>N/a: 0                             | Ever: 2<br>Never: 0<br>N/a: 1                             |
| Alcohol                             | Heavy drinker: 1<br>Occ. alcohol: 2<br>Never: 0<br>N/a: 0 | Heavy drinker: 0<br>Occ. alcohol: 2<br>Never: 1<br>N/a: 0 |

**Supplemental Table 6:** Patient characteristics of 3 HPV+ and 3 HPV- fresh frozen HNSCC samples used for MeDIP-Seq and BS-Seq analysis.

| Cell line   | Origin (site) | HPV status        |
|-------------|---------------|-------------------|
| UPCI:SCC90  | oropharynx    | HPV+ (integrated) |
| UM:SCC47    | oropharynx    | HPV+ (integrated) |
| 93-VU-147T  | oral cavity   | HPV+ (integrated) |
| UPCI:SCC003 | oropharynx    | HPV-              |
| UPCI:SCC036 | oropharynx    | HPV-              |
| PCI-30      | oral cavity   | HPV-              |

**Supplemental Table 7:** HPV+ and HPV- HNSCC cell lines used for experiments.

| Name of primer                                | Primer Sequence (5'-3')       |
|-----------------------------------------------|-------------------------------|
| forward L1/2 PCR primer vol. 2<br>(5541-5569) | AATATATAATTATTGTTGATGTAGGTGAT |
| reverse L1/2 PCR primer vol. 2<br>(5984-5962) | ACCCACACCTAATAACTAACCCAC      |

**Supplemental Table 8:** L1 and L2 PCR primers used for validation of MeDIP-Seq results by BS-Seq.

Supplementary Figures

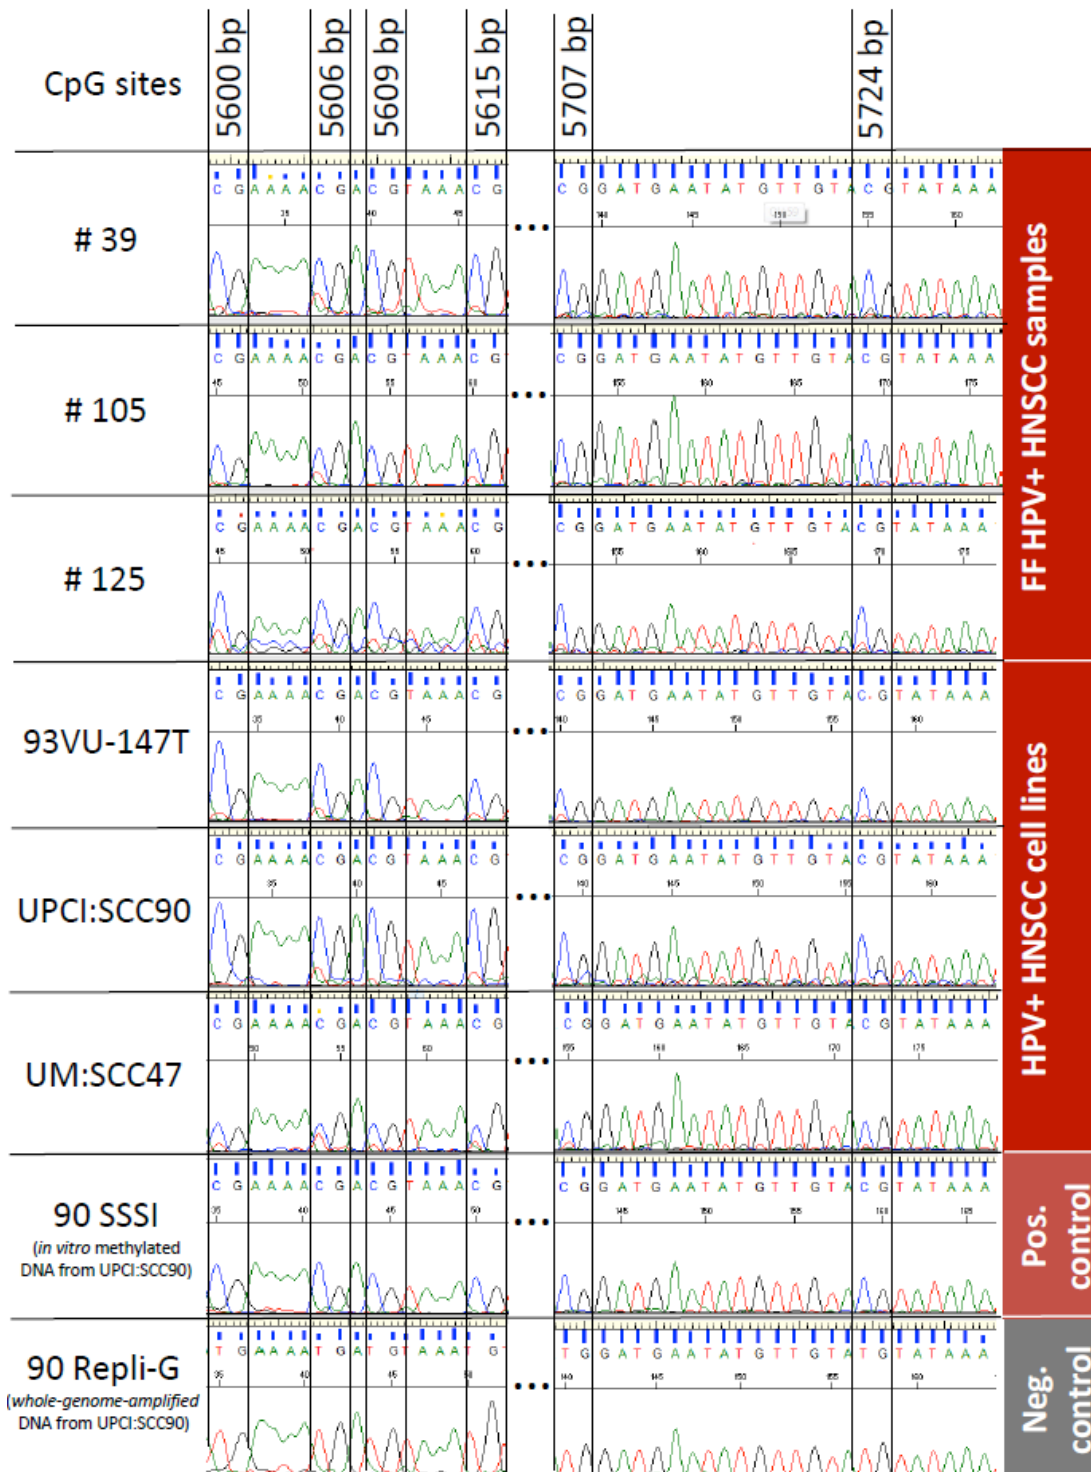

**Figure S1:** Methylation of the L1/2 boundary region is observed in all tested FF HPV type 16+ HNSCC tissue samples and 3 HPV type 16+ HNSCC cell lines (UPCI:SCC90, UM:SCC47, 93VU-147T). Selected BS-Seq traces, covering the 6 CpG sites of interest, are illustrated along with the positive (*in vitro* methylated DNA from UPCI:SCC90) and negative (whole-genome amplified DNA from UPCI:SCC90) control at six CpG sites at genomic position 5600, 5606, 5609, 5615, 5707, and 5724 of the HPV type 16 genome.

**A** Hypermethylated DMRs  
n=782

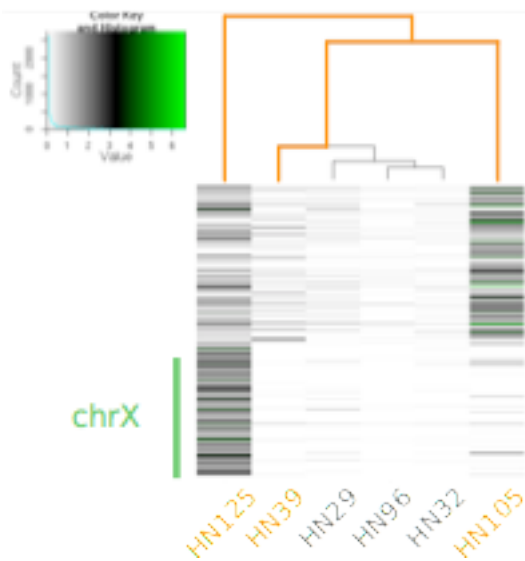

**B** Hypomethylated DMRs  
n=386

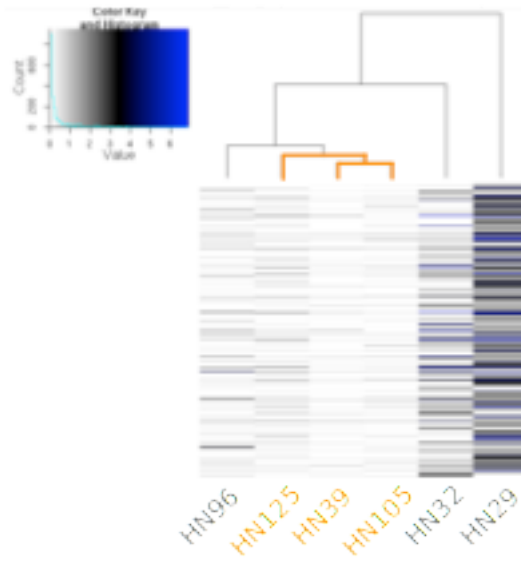

**Figure S2: Hypermethylation of female chromosome X drives many of the hypermethylated differentially methylated regions (DMRs).**

A. Heatmap of MeDIP-signal in reads per million (rpm) for each sample in the two cohorts in the hypermethylated (HPV+ rel. to HPV-) set of DMRs. For the purpose of visualisation, outliers with signal greater than 7 rpm were removed. Samples in the HPV- cohort are shown in black, samples in the HPV+ cohort are highlighted in orange. The heatmap is clustered according to column. DMRs labelled by the green line map to chrX. **B.** Same as above for hypomethylated DMRs (HPV+ rel. to HPV-).



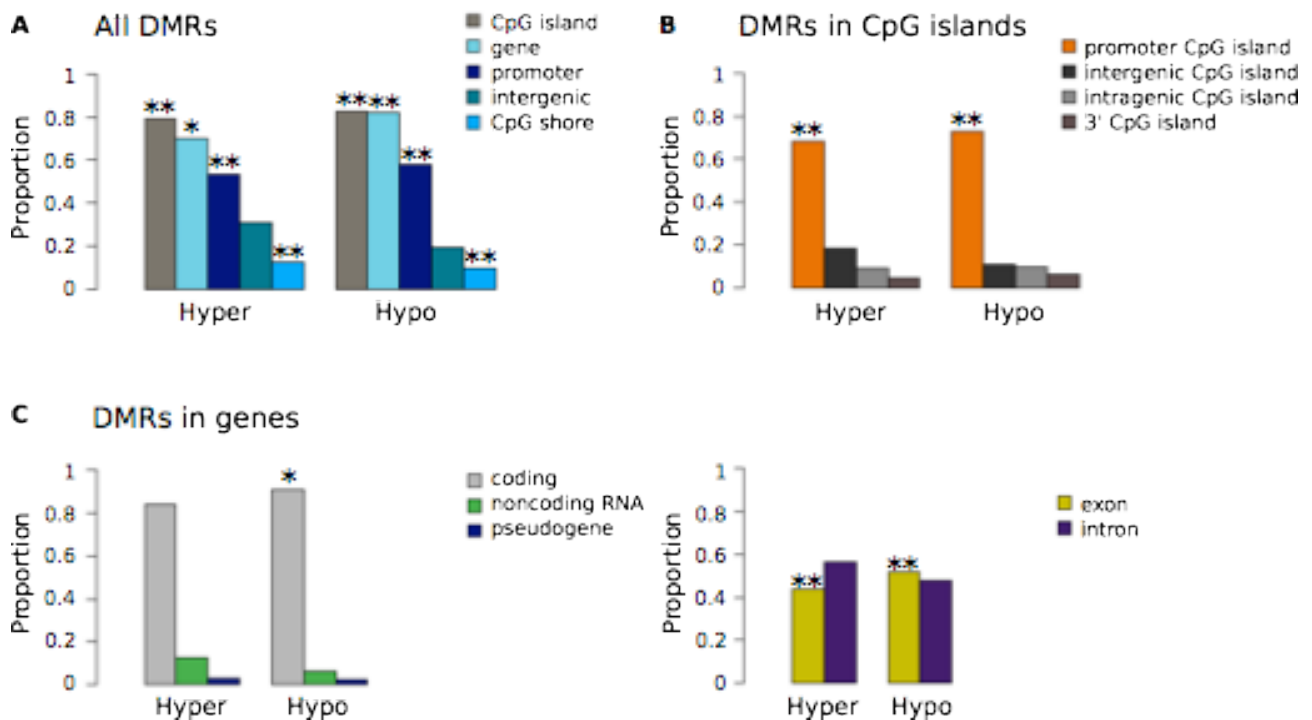

**Figure S3:** DMRs were annotated with a genomic feature if minimum 51% of the DMR overlapped the feature or 51% of the feature overlapped the DMR. Fisher's Exact test was used to determine the level of significance of the association as described in Materials & Methods. (\*) indicates  $P \leq 0.05$ ; (\*\*) indicates  $P \leq 0.001$ . **A.** Overlap for the final set of DMRs (Hypermethylated  $n=209$ , Hypomethylated  $n=244$ ) with genomic features. **B.** DMRs that fall into CpG Islands are significantly associated with promoter CpG islands but not intergenic, intragenic or 3' CpG islands. **C.** (left panel) Hypomethylated DMRs that fall into genes show a weak significant association with coding regions; no preference for a particular subclass of genic regions could be identified among hypermethylated DMRs. Both hyper- and hypomethylated DMRs that fall into genes show significant association with exons (right panel).

```
5521          aatatacaat tattgctgat gcaggtgact tttatttaca
5581 tcctagttat tacatgtta c gaaaa cga cg taaa cg tta ccatatttt tttcagatgt
5641 ctctttggct gcctagtgag gccactgtct acttgcctcc tgtoccagta tctaaggttg
5701 taagca cg ga tgaatatgtt gca cg cacia acatatatta tcatgcagga acatccagac
5761 tacttgcagt tggacatccc tattttccta ttaaaaaacc taacaataac aaaatattag
5821 ttctaaaagt atcaggatta caatacaggg tatttagaat acatttacct gacccaata
5881 agtttggttt tcttgacacc tcattttata atccagatac acag cg gctg gtttgggcct
5941 gtgtaggtgt tgaggtaggc cg tggtcagc cattaggtgt gggc
```

**Figure S4:** 421 bp viral DNA segment of interest.
